# Supplementary material
Source: publisher figshare collection journal article supplement (https://sage.figshare.com/ndownloader/files/21001404)
Supplement: Supplementary file 1 [file 21001404]

**Appendix C. Descriptions of the Development and Content Validity Studies on Included Instruments.**

| Source <sup>a</sup><br>(alphabetical order) | Instrument                                                                      | Purpose of study                                                                                                                                                                              | Study population <sup>b</sup>                                                                                                                                                                                                                                                              | Age <sup>c</sup> (range [R] and/or Mean [MN] and/or Standard Deviation [SD])                                               |
|---------------------------------------------|---------------------------------------------------------------------------------|-----------------------------------------------------------------------------------------------------------------------------------------------------------------------------------------------|--------------------------------------------------------------------------------------------------------------------------------------------------------------------------------------------------------------------------------------------------------------------------------------------|----------------------------------------------------------------------------------------------------------------------------|
| Bavolek et al. (1979)                       | <b>Adult Adolescent Parenting Inventory-2 (AAPI-2)</b>                          | To develop and validate the AAPI (as an original version of the AAPI-2)                                                                                                                       | N = 9 (Stage: Construct development): (I) Professionals in child maltreatment<br>N = 3,000 (Stage: Pilot Testing): (II) Adolescents attending high schools (grade 10-12)                                                                                                                   | (I) R = NR, MN = NR, SD = NR; (II) R = NR, MN = NR, SD = NR                                                                |
| Gordon et al. (1979)                        | <b>Intensity of Parental Punishment Scale (IPPS)</b>                            | To develop and validate the IPPS                                                                                                                                                              | N = 417: (I) n = 301: Parents of 5- to 10-year-old children; (II) n = 50: Upper-middle-class parents of 7- to 12-year old children; (III) n = 26: Mothers of 6- to 9-year-old children; (IV) n = 40: Mothers of 6- to 14-year-old children                                                 | (I) R = NR, MN = NR, SD = NR; (II) R = NR, MN = NR, SD = NR; (III) R = NR, MN = NR, SD = NR; (IV) R = NR, MN = NR, SD = NR |
| Heyman et al. (2019)                        | <b>Family Maltreatment-Child Abuse criteria (FM-CA)</b>                         | To develop and validate the FM-CA                                                                                                                                                             | N = 126: U.S. Air Force service members and their spouses (F = 41; M = 85)                                                                                                                                                                                                                 | R = NR, MN = NR, SD = NR                                                                                                   |
| Holden and Zambarano (1992)                 | <b>Parental Response to Child Misbehavior questionnaire (PRCM)</b>              | To exam parental responses to children's misbehavior in maternal reported use of physical punishment by using the CPSS and the PRCM                                                           | N = 132: Mothers of 12- to 48-month-old children (F = 132; M = 0)                                                                                                                                                                                                                          | R = 20-44y, MN = 31.4y, SD = 4.5y                                                                                          |
| Lang and Connell (2017)                     | <b>Child Trauma Screen-Exposure Score (CTS-ES)</b>                              | To develop and validate the CTS-ES                                                                                                                                                            | N = 923 (Stage: CTS-ES Development): (I) Parents of children receiving care at outpatient behavioral health clinics<br>N = 69 (Stage: CTS-ES Validation): (II) Parents of children receiving care at outpatient behavioral health clinics                                                  | (I) R = NR, MN = NR, SD = NR; (II) R = NR, MN = NR, SD = NR                                                                |
| Loeber et al. (1998)                        | <b>Child Neglect Scales-Maternal Monitoring and Supervision scale (CNS-MMS)</b> | To examine delinquency, substance use, early sexual behavior, and mental health problems of urban boys by using diverse instruments including the SIS (as an original version of the CNS-MMS) | N = 1507: (I) n = 503: parents with boys in the first grade in Pittsburgh public schools; (II) n = 508: parents with boys in the fourth grade in Pittsburgh public schools (III) n = 506: parents with boys in the seventh grade in Pittsburgh                                             | (I) R = NR, MN = NR, SD = NR; (II) R = NR, MN = NR, SD = NR; (III) R = NR, MN = NR, SD = NR                                |
| Meinch et al. (2018)                        | <b>ISPCAN Child Abuse Screening Tool for use in Trials (ICAST-Trial)</b>        | To develop and validate the ICAST-Trial                                                                                                                                                       | N = 115 (Stage: Pilot study) (I) Parents of adolescents participated in a parenting program to prevent child abuse (F = 112; M = 3)<br>N = 552 (Stage: Validation of ICAST-Trial) (II) Parents of adolescents participated in a parenting program to prevent child abuse (F = 523; M = 29) | (I) R = NR, MN = 48y, SD = 13.6y; (II) R = NR, MN = 49.4y, SD = 14.69y                                                     |
| Runyan et al. (2009)                        | <b>ISPCAN Child Abuse Screening Tool for use in Trials (ICAST-Trial)</b>        | To develop and validate the ICAST-P (as an original version of the ICAST-Trial)                                                                                                               | N = 51 (Stage: Item development): (I) Professionals in child maltreatment<br>N = 697 (Stage: Pilot Testing): (II) Parents with children under the age of 18 in six different countries                                                                                                     | (I) R = NR, MN = NR, SD = NR; (II) R = NR, MN = NR, SD = NR                                                                |

(continued)

**Appendix C. (continued)**

| Source <sup>a</sup><br>(alphabetical order) | Instrument                                                              | Purpose of study                                                                                                                  | Study population <sup>b</sup>                                                                                                                                                                                                                                                                                                                                                                                                                                  | Age <sup>c</sup> (range [R] and/or Mean [MN] and/or Standard Deviation [SD])                                                                            |
|---------------------------------------------|-------------------------------------------------------------------------|-----------------------------------------------------------------------------------------------------------------------------------|----------------------------------------------------------------------------------------------------------------------------------------------------------------------------------------------------------------------------------------------------------------------------------------------------------------------------------------------------------------------------------------------------------------------------------------------------------------|---------------------------------------------------------------------------------------------------------------------------------------------------------|
| Russell and Britner (2006)                  | <b>Shaken Baby Syndrome awareness assessment-Short Version (SBS-SV)</b> | To develop and evaluate the psychometric properties of the SBS (as an original version of the SBS-SV)                             | N = 288 (Stage: Pilot study) (I) Undergraduate psychology students (F = 207; M = 81)<br>N = 264 (Stage: Validation of SBS) (II) Caregivers and non-caregivers over the age of 18 (F = 191; M = 73)                                                                                                                                                                                                                                                             | (I) R = 17-31y, MN = 19y, SD = NR; (II) R = 18-78y, MN = 32y, SD = NR                                                                                   |
| Straus et al. (1995)                        | <b>Mother-Child Neglect Scale (MCNS)</b>                                | To describe the development and validation of the MNBS (as an original version of the MCNS)                                       | N = 359: Adolescents and adults (F = 236, M = 123)                                                                                                                                                                                                                                                                                                                                                                                                             | R = NR, MN = NR, SD = NR                                                                                                                                |
| Straus et al. (1995)                        | <b>Mother-Child Neglect Scale-Short Form (MCNS-SF)</b>                  | To describe the development and validation of the MNBS-SF (as an original version of the MCNS-SF)                                 | N = 359: Adolescents and adults (F = 236, M = 123)                                                                                                                                                                                                                                                                                                                                                                                                             | R = NR, MN = NR, SD = NR                                                                                                                                |
| Straus et al. (1998)                        | <b>Conflict Tactics Scales: Parent-Child version (CTSPC)</b>            | To develop and test the reliability and validity of CTSPC                                                                         | N = 1,000: Parents of children under 18 years old participated in an U.S. national survey (F = 660; M = 340)                                                                                                                                                                                                                                                                                                                                                   | R = NR, MN = 36.8y, SD = NR                                                                                                                             |
| Stewart et al. (2015)                       | <b>Child Neglect Questionnaire (CNQ)</b>                                | To develop and evaluate psychometric properties of the CNQ                                                                        | N = 172: (I) n = 76: Parents of children having fathers with Substance Use Disorder (SUD); (II) n = 96: Parents of children having fathers without SUD                                                                                                                                                                                                                                                                                                         | (I) R = NR, MN = NR, SD = NR; (II) R = NR, MN = NR, SD = NR                                                                                             |
| Twentyman et al. (1981)                     | <b>Parent Opinion Questionnaire (POQ)</b>                               | To develop and validate the POQ                                                                                                   | N = 30 (Stage: Item development): (I) n = 23: Child protective case workers (II) n = 7: Health nurses<br>N = 15 (Stage: Cross validation): (III) Child protective case workers                                                                                                                                                                                                                                                                                 | (I) R = NR, MN = NR, SD = NR; (II) R = NR, MN = NR, SD = NR; (III) R = NR, MN = NR, SD = NR                                                             |
| Zaidi et al. (1989)                         | <b>Analog Parenting Task (APT)</b>                                      | To determine whether there was an association between punitive childhood histories by the AEIII and abusive parenting by the APT. | N = 86 (Stage: preliminary study) (I) n = 49: university students experienced severe physical punishment in childhood (F = 19; M = 30); (II) n = 37: university students experienced mild physical punishment in childhood (F = 26; M = 11)<br>N = 338 (Stage: main study) (III) n = 169: Mothers of children referred for child psychiatry service (F = 169; M = 0); (IV) n = 169: Fathers of children referred for child psychiatry service (F = 0; M = 169) | (I) R = 18-24y, MN = 19.4y, SD = NR; (II): R = 17-23y, MN = 19.0y, SD = NR; (III) R = 22-51y, MN = 34.2y, SD = NR; (IV) R = 22-57y, MN = 36.8y, SD = NR |

Notes. AAPI = Adult Adolescent Parenting Inventory; AEIII = Assessing Environments III; CAP = Child Abuse Potential inventory; CPSS = Computer-Presented Social Situations; ICAST-P = ISPCAN (International Society for the Prevention of Child Abuse and Neglect) Child Abuse Screening Tool-Parent version; MNBS = Multidimensional Neglectful Behavior Scale; MNBS-SF = Multidimensional Neglectful Behavior Scale-Short Form; SIS = Supervision and Involvement Scale; SBS = Shaken Baby Syndrome awareness assessment.

<sup>a</sup> References of the development and content validity studies on included instruments can be found in the reference section of this review.

<sup>b</sup> N = total sample size; n = subgroups; M = male; F = female.

<sup>c</sup> R = range; MN = mean; Med = median; NR = not reported; SD = standard deviation; NR = Not Reported.
